# Supplementary material for: Towards the real-time monitoring of industrial wastewater treatment processes via photoelectrochemical oxygen demand measurements
Source: Royal Society of Chemistry journal article supplement (doi:10.1039/c7ew00471k), 2018-01-01
Supplement: c7ew00471k1.pdf [file c7ew00471k1.pdf]

## **Electronic Supplementary Information for:**

Towards the real-time monitoring of industrial wastewater treatment processes via  
photoelectrochemical oxygen demand measurements

Kimia Aghasadeghi, Melissa J. Larocque, David R. Latulippe\*

Department of Chemical Engineering, McMaster University, 1280 Main Street West, Hamilton,  
Ontario, L8S 4L7, Canada

\*To whom correspondence may be addressed:

David R. Latulippe (e-mail) [latulippe@mcmaster.ca](mailto:latulippe@mcmaster.ca); (telephone) 1-905-525-9140 ext 24011

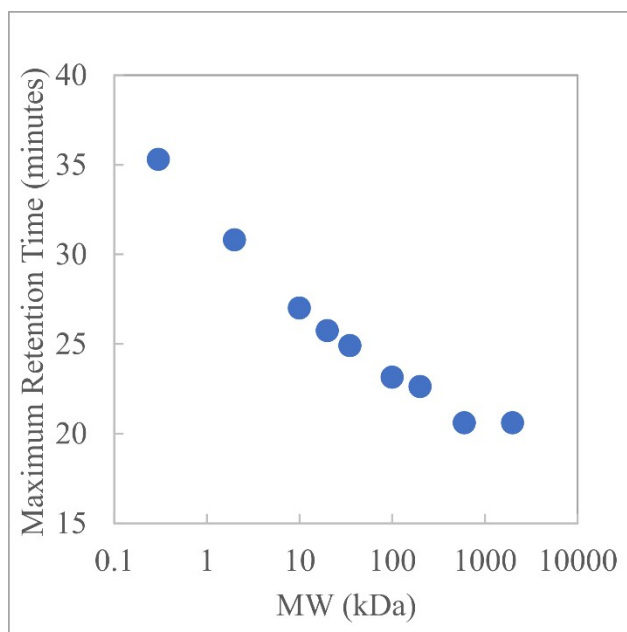

Figure S-1- SEC peak retention times of the PEG/PEO samples used in this study plotted against their molecular weights as reported by the supplier (Sigma Aldrich, Oakville, ON, Canada). For the samples that were reported to have a range of molecular weight values, the average of the high and low values was used for the x-axis value.

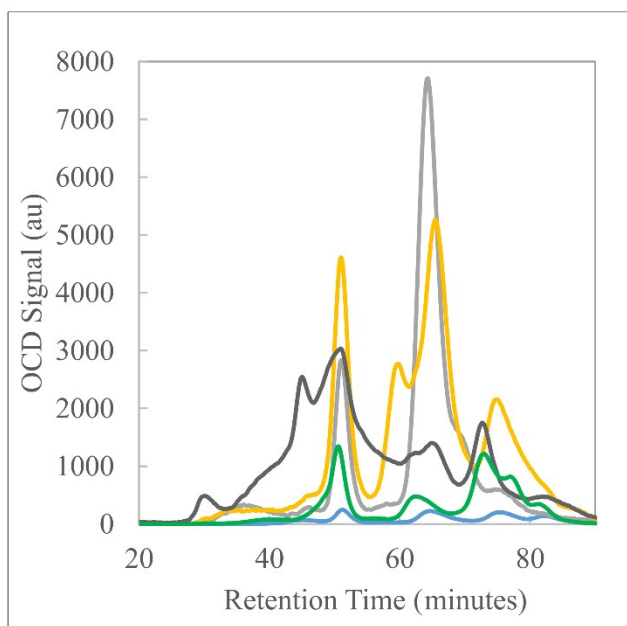

Figure S-2- LC-OCD chromatograms of five industrial wastewater samples provided by an industrial wastewater treatment plant (Aevitas, Brantford, ON, Canada) that receives and treats wastewater from a variety of industrial and commercial facilities.

Table S-1- The PeCOD® L100 analyzer parameters used in this study

| Parameter Name      | Value           | Description                                                                                                                                                                                                                                     |
|---------------------|-----------------|-------------------------------------------------------------------------------------------------------------------------------------------------------------------------------------------------------------------------------------------------|
| LED Current         | Varies          | This parameter is set by running either the New Sensor or the Calibration routine. It indicates the level of the LED output required to meet the target I-term (i.e. the current generated at the end of the calibration reference oxidation.). |
| Applied Potential   | 400 mV          | Sets the reference electrode potential.                                                                                                                                                                                                         |
| Pre-Burn Time       | 600 s           | In peCOD measurement the sample is injected into and oxidized in the thin-layer cell twice. Pre-Burn Time is the first-round oxidation (i.e. Pre-Burn) maximum allowed time before a time out error.                                            |
| Burn Time           | 600 s           | This is the Maximum allowed time for the second round of oxidation (i.e. Burn) before an "incomplete oxidation" error.                                                                                                                          |
| Target I-Term       | 20.0 c          | Sets target I-term for calibration routine.                                                                                                                                                                                                     |
| Minimum Burn Time   | 240 s           | Minimum time for oxidation before termination criteria is satisfied.                                                                                                                                                                            |
| Q Negative          | -100 $\mu$ C    | Allowable level of the net electric charge (i.e. $Q_{net} = Q_{reference} - Q_{blank}$ ) that can be measured below the charge generated during the blank oxidation, before a "Less than zero" error will be reported.                          |
| Blank Prime Volume  | 2200 $\mu$ l    | Volume of solution to be primed through PeCOD® analyzer head and through sensor bypass path                                                                                                                                                     |
| Inject Volume       | 200 $\mu$ l     | Volume of solution to be primed through sensor analysis path.                                                                                                                                                                                   |
| Advance Volume      | 20 $\mu$ l      | Volume of solution to be primed through sensor analysis path.                                                                                                                                                                                   |
| Sample Prime Volume | 2200 $\mu$ l    | Volume of solution to be primed through PeCOD® analyzer head and through sensor bypass path.                                                                                                                                                    |
| Precision           | PRECISE         | Choice of operation type (precise or rapid)                                                                                                                                                                                                     |
| Ref40Intensity      | 0 ADC           | UV Emission level when LED is set to 400mA at 40°C. Measured in detector ADC units.                                                                                                                                                             |
| Current Gain        | 45.3 $\mu$ A/V  | This is the potentiostat current gain calibration. Should not vary from the default by more than 5%.                                                                                                                                            |
| Maximum $V_{aux}$   | 2.4 V           | An error is generated if $V_{aux}$ (i.e. the difference in charge between the auxiliary electrode and the working electrode) exceeds this value during integration.                                                                             |
| Maximum $V_{ref}$   | 2.4 V           | An error is generated if $V_{ref}$ (i.e. the difference in charge between the reference electrode and the working electrode) exceeds this value during integration.                                                                             |
| Maximum I-work      | 150 $\mu$ A     | An error is generated if the current (I-work) generated by oxidation of the sample exceeds this value during integration                                                                                                                        |
| Max LED Current     | 500 mA          | The LED current is prevented from exceeding this value. This protects the LED from feedback control loop failure.                                                                                                                               |
| Max LED Temp        | 60°C            | An error is generated if the LED temperature proxy exceeds this value during operation.                                                                                                                                                         |
| Max Module Temp     | 50°C            | An error is generated if the processor temperature exceeds this value during operation.                                                                                                                                                         |
| TermGradientC       | -0.01 $\mu$ A/s | When the gradient of I-Work (i.e. $d(I\text{-}Work)/dt$ ) drops to this value the oxidation is terminated.                                                                                                                                      |

Table S-2- SEC system information

|                         |                                                                                                           |
|-------------------------|-----------------------------------------------------------------------------------------------------------|
| Columns                 | Waters Ultrahydrogel-120, -250 and -500; 7.8 mm × 300 mm (internal diameter × length) connected in series |
| Detector                | Refractive index                                                                                          |
| Solvent                 | 0.5 M sodium nitrate plus 25 mM (2-cyclohexylamino) ethanesulfonic acid buffer (pH 10)                    |
| Sample Injection Volume | 20 µL                                                                                                     |
| Sample Concentration    | 5 to 10 g/L                                                                                               |
| Calibration             | Pre-calibrated with PEG standards up to a molecular weight of 800 kDa                                     |

Table S-3- COD<sub>Cr</sub> results for the macromolecule samples

| Macromolecule   | MW (kDa)  | COD <sub>Cr</sub> (mg/L) |
|-----------------|-----------|--------------------------|
| Ethylene glycol | 0.06      | 623                      |
| PEG             | 0.3       | 615                      |
|                 | 2         | 561                      |
|                 | 10        | 699                      |
|                 | 20        | 577                      |
| PEO             | 35        | 611                      |
|                 | 100       | 513                      |
|                 | 200       | 665                      |
|                 | 600       | 574                      |
|                 | 2,000     | 593                      |
| Dextran         | 1         | 582                      |
|                 | 6         | 525                      |
|                 | 40        | 557                      |
|                 | 100       | 606                      |
|                 | 200       | 575                      |
|                 | 550       | 548                      |
| PVP             | 2,000     | 568                      |
|                 | 10        | 589                      |
|                 | 40        | 554                      |
|                 | 360       | 562                      |
| PAM             | 1,300     | 544                      |
|                 | 10        | 599                      |
|                 | 41        | 551                      |
|                 | 150       | 599                      |
|                 | 5000-6000 | 551                      |
